# Supplementary material for: Photoelectrochemical Response Enhancement for Metallofullerene-[12]Cycloparaphenylene Supramolecular Complexes
Source: MDPI journal article supplement (doi:10.3390/nano12091408), 2022-04-20
Supplement: s1 [file s1]

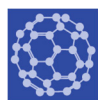

Supplementary Materials of

# Photoelectrochemical Response Enhancement for Metallofullerene-[12] Cycloparaphenylene Supramolecular Complexes

Jie Zhang <sup>1,2,3</sup>, Ling Qiu <sup>1</sup>, Linshan Liu <sup>1</sup>, Yang Liu <sup>1</sup>, Peng Cui <sup>4,\*</sup>, Fang Wang <sup>5</sup> and Zhuxia Zhang <sup>1,\*</sup>

<sup>1</sup> College of Chemistry, Taiyuan University of Technology, Taiyuan 030024, China; ql7222785@163.com (L.Q.); l\_lynn33@163.com (L.L.); liuliuyang258@163.com (Y.L.)

<sup>2</sup> Beijing National Laboratory for Molecular Sciences, Key Laboratory of Molecular Nanostructure and Nanotechnology, Institute of Chemistry, Chinese Academy of Sciences, Beijing 100190, China; zhangjie654@iccas.ac.cn

<sup>3</sup> University of Chinese Academy of Sciences, Beijing 100049, China

<sup>4</sup> School of Information, Guizhou University of Finance and Economics, Guiyang 550025, China

<sup>5</sup> Collaborative Innovation Center for Shanxi Advanced Permanent Magnetic Materials and Technology, Linfen 041004, China; wangfanghc@sxnu.edu.cn

\* Correspondence: pcui@ustc.edu.cn (P.C.); zhangzhuxia@tyut.edu.cn (Z.Z.)

## MALDI-TOF

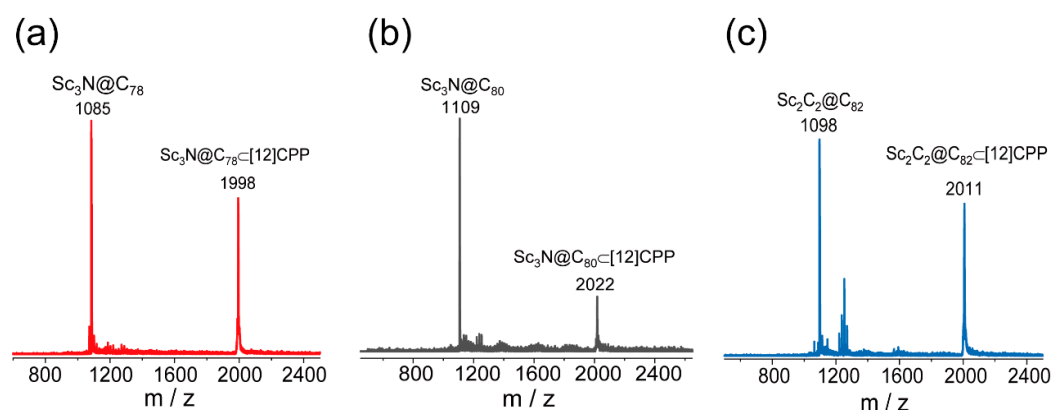

**Figure S1.** Corresponding MALDI-TOF mass spectra of prepared (a)  $\text{Sc}_3\text{N}@\text{C}_{78}$  and  $\text{Sc}_3\text{N}@\text{C}_{78}@[12]\text{CPP}$ , (b)  $\text{Sc}_3\text{N}@\text{C}_{80}$  and  $\text{Sc}_3\text{N}@\text{C}_{80}@[12]\text{CPP}$ , and (c)  $\text{Sc}_2\text{C}_2@\text{C}_{82}$  and  $\text{Sc}_2\text{C}_2@\text{C}_{82}@[12]\text{CPP}$ , respectively.

## UV-Vis-NIR Spectrum

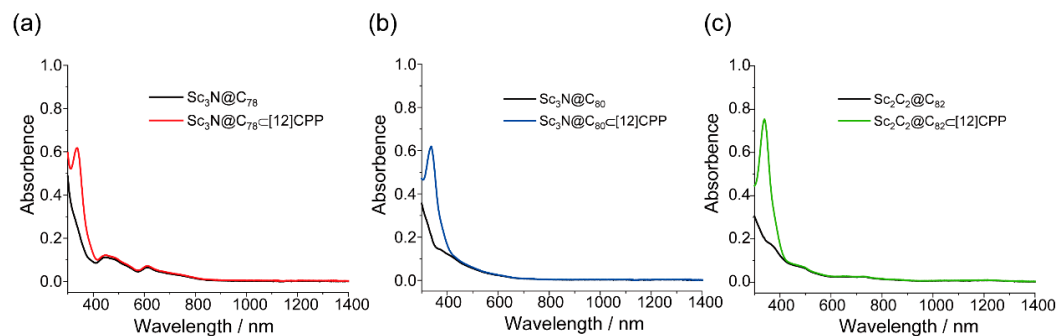

**Figure S2.** UV-Vis-NIR absorption spectra of (a)  $\text{Sc}_3\text{N}@\text{C}_{78}$  and  $\text{Sc}_3\text{N}@\text{C}_{78}@[12]\text{CPP}$ , (b)  $\text{Sc}_3\text{N}@\text{C}_{80}$  and  $\text{Sc}_3\text{N}@\text{C}_{80}@[12]\text{CPP}$ , and (c)  $\text{Sc}_2\text{C}_2@\text{C}_{82}$  and  $\text{Sc}_2\text{C}_2@\text{C}_{82}@[12]\text{CPP}$ , respectively.

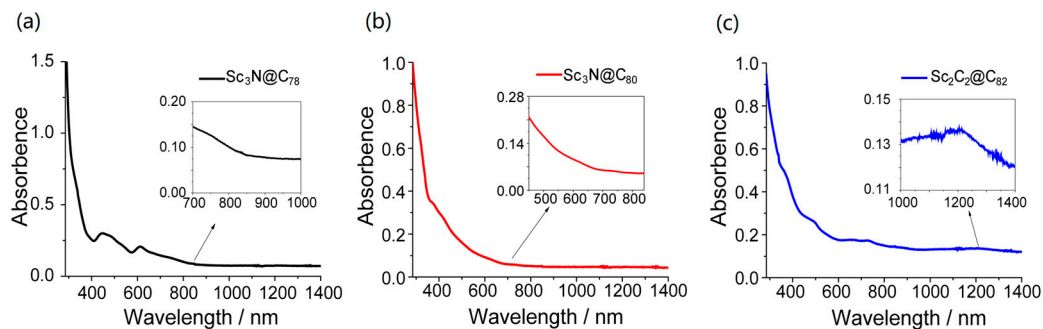

**Figure S3.** UV-vis-NIR absorption spectra of (a)  $\text{Sc}_3\text{N@C}_{78}$ , (b)  $\text{Sc}_3\text{N@C}_{80}$  and (c)  $\text{Sc}_2\text{C}_2\text{@C}_{82}$ , respectively. The insets show the enlarged spectra around onset wavelength.

### Bonding Energies

Bonding energies were calculated at the level of B3LYP/6-31G\* and realized by DFT [31]. The Gaussian 16 (A.03) program package was employed for all quantum chemistry calculations.

**Table S1.** The optimized energies of complex  $\text{EMFs} + [12]\text{CPP}$ ,  $\text{EMFs}$  and  $[12]\text{CPP}$  (Kcal·mol<sup>-1</sup>).

| Energy                                                 | $\text{EMFs} + [12]\text{CPP}$ | $\text{EMFs}$ | $[12]\text{CPP}$ | Bonding Energy( $\Delta E$ ) |
|--------------------------------------------------------|--------------------------------|---------------|------------------|------------------------------|
| $\text{Sc}_2\text{C}_2\text{@C}_{82} + [12]\text{CPP}$ | -4703407.9006                  | -2963394.0343 | -1739965.4938    | -48.3725                     |
| $\text{Sc}_3\text{N@C}_{78} + [12]\text{CPP}$          | -5071731.4772                  | -3331721.9132 | -1739965.4938    | -44.0702                     |
| $\text{Sc}_3\text{N@C}_{80} + [12]\text{CPP}$          | -5119591.0014                  | -3379581.2244 | -1739965.4938    | -44.2832                     |

Bonding energies  $\Delta E$  were evaluated in the following equation:

$$\Delta E = E(\text{EMFs} + [12]\text{CPP}) - E(\text{EMFs}) - E([12]\text{CPP})$$

where  $E(\text{EMFs} + [12]\text{CPP})$ ,  $E(\text{EMFs})$  and  $E([12]\text{CPP})$  are total energies of each compound.

### SEM Images

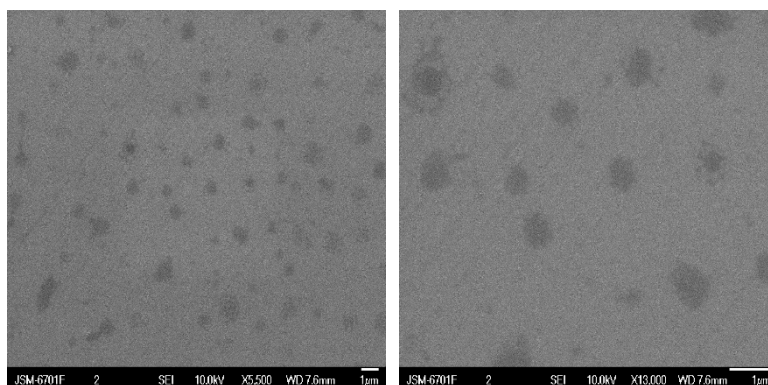

**Figure S4.** SEM image of  $\text{Sc}_2\text{C}_2\text{@C}_{82}$ .

### Photocurrent Response of Monomer

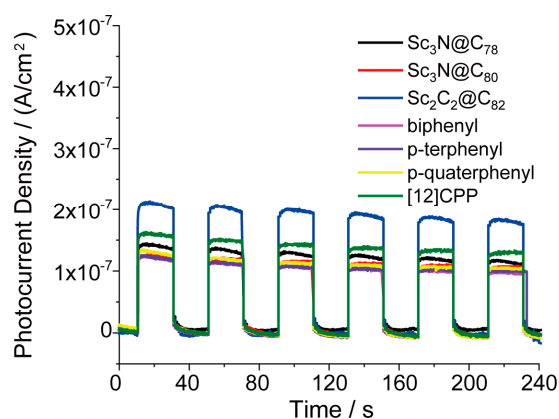

**Figure S5.** Photocurrent response intensity of metallofullerenes, biphenyl, p-terphenyl, p-quaterphenyl and [12]CPP on FTO glass.

UV-Vis-NIR spectra of  $\text{Sc}_3\text{N}@C_{78}$ ,  $\text{Sc}_3\text{N}@C_{80}$  and  $\text{Sc}_2\text{C}_2@C_{82}$  with biphenyl ( $2.4 \times 10^{-4}$  M), p-terphenyl ( $1.6 \times 10^{-4}$  M), p-quaterphenyl ( $1.2 \times 10^{-4}$  M) and [12]CPP. The different concentrations were employed to ensure that to ensure that they have the same number of benzene rings with [12]CPP.

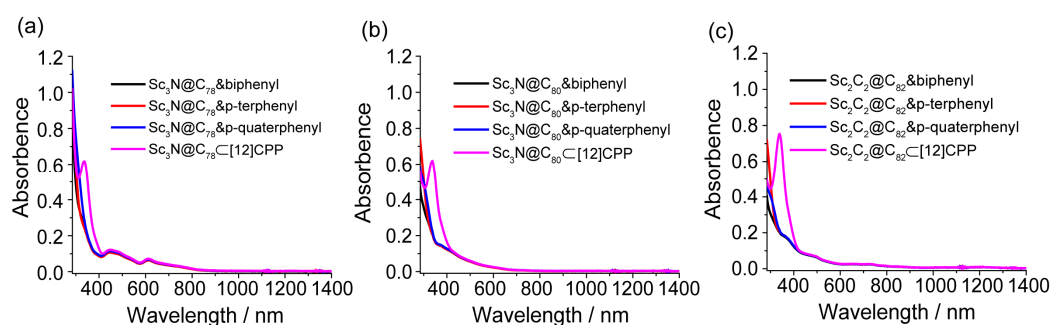

**Figure S6.** UV-Vis-NIR spectra of (a)  $\text{Sc}_3\text{N}@C_{78}$ , (b)  $\text{Sc}_3\text{N}@C_{80}$  and (c)  $\text{Sc}_2\text{C}_2@C_{82}$  with biphenyl, p-terphenyl, p-quaterphenyl and [12]CPP, respectively.
